# Supplementary material for: A Novel Toxin from Haplopelma lividum Selectively Inhibits the NaV1.8 Channel and Possesses Potent Analgesic Efficacy
Source: PubMed Central journal article supplement (PMC5308240; doi:10.3390/toxins9010007), 2016-12-26
Supplement: toxins-09-00007-s001.pdf [file toxins-09-00007-s001.pdf]

# Supplementary Materials: A Novel Toxin from *Haplopelma lividum* Selectively Inhibits Nav1.8 Channel and Possesses Potent Analgesic Efficacy

Ping Meng, Honggang Huang, Gan Wang, Shilong Yang, Qiuming Lu, Jingze Liu, Ren Lai and Mingqiang Rong

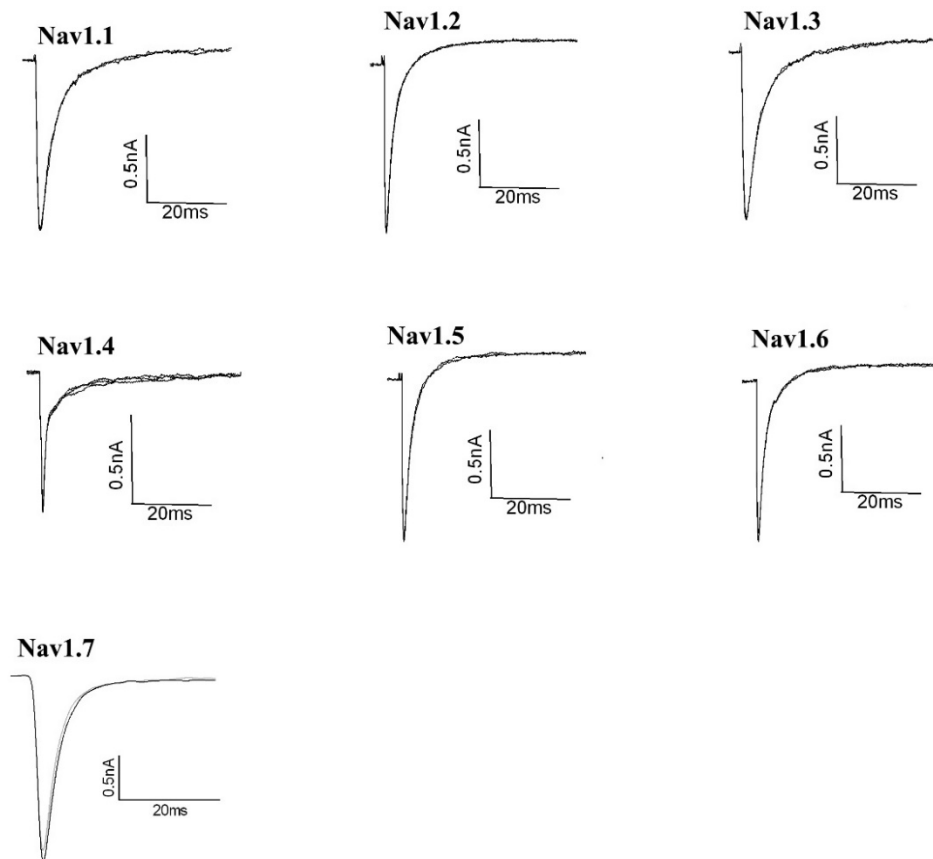

**Figure S1.**  $\mu$ -TRTX-H11a showed no effect on Nav1.1, Nav1.2, Nav1.3, Nav1.4, Nav1.5, Nav1.6 and Nav1.7.

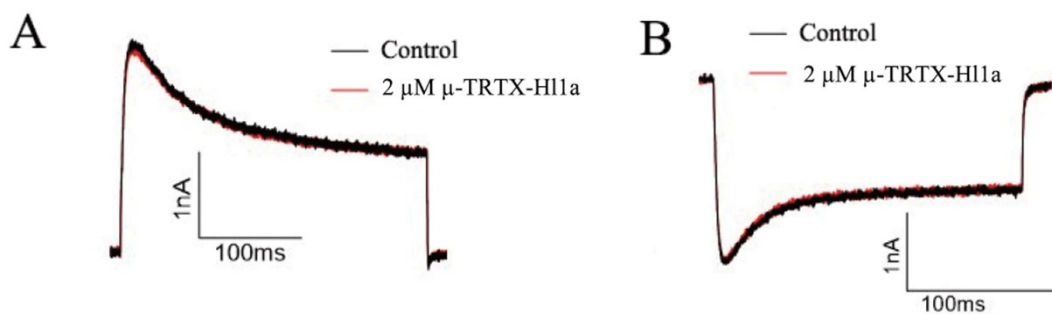

**Figure S2.**  $\mu$ -TRTX-H11a showed no effect on  $K_v$  (A) currents and  $Cav$  (B) currents of DRG neurons.
